# Supplementary material for: Doctor-Patient Communication and Sensory Disabilities among Community-Dwelling Older Adults: Findings from NHATS
Source: Research Square preprint supplement (doi:10.21203/rs.3.rs-9390116/v1), 2026-06-04
Supplement: Supplementary file 1 [file 98601d573a8ef271224dfccc.docx]

**Table 1.** Descriptive statistics for analysis variables in Rounds 5 and 11.

| **Variables** | **Round 5**  **Frequencies (%)** | **Round 11**  **Frequencies (%)** |
| --- | --- | --- |
| **Hearing/Vision Loss** |  |  |
| Near Vision Loss |  |  |
| Present | 150 (4.03%) | 597 (16.03%) |
| Absent | 3575 (95.97%) | 3128 (83.97) |
| Distance Vision Loss |  |  |
| Present | 216 (5.80%) | 688 (18.47%) |
| Absent | 3509 (94.20%) | 3037 (81.53%) |
| Hearing Loss |  |  |
| Present | 842 (22.60%) | 1479 (39.70%) |
| Absent | 2883 (77.40%) | 2246 (60.30%) |
| **Demographics** |  |  |
| Gender |  |  |
| Male | 1531(41.1%) | 1531(41.1%) |
| Female | 2194(58.9%) | 2194(58.9%) |
| Age |  |  |
| 65-74 | 1666(44.72%) | 468(12.56%) |
| 75+ | 2059(55.28%) | 3257(87.44%) |
| Race |  |  |
| Black, Non-Hispanic | 757 (20.38%) | 757 (20.38%) |
| White, Non-Hispanic | 2685 (72.27%) | 2685 (72.27%) |
| Hispanic | 183 (4.93%) | 183 (4.93%) |
| Other Race | 90 (2.42%) | 90 (2.42%) |
| Education |  |  |
| Below High School | 663 (17.85%) | 663 (17.85%) |
| High School up to Trade School | 1224 (32.95%) | 1224 (32.95%) |
| Some College (minimum community  college) or above | 1828 (49.21%) | 1828 (49.21%) |
| Marital Status |  |  |
| Married or With a Partner | 1952(52.40%) | 1606(43.12%) |
| Separated, Divorced, Widowed, Never Married | 1773(47.60%) | 2119(56.88%) |
| **Medical Problems** |  |  |
| Medical Management |  |  |
| Always Did it by Self | 3416 (91.70%) | 3107 (83.41%) |
| Otherwise | 309 (8.30%) | 618 (16.59%) |
| Health Condition Impairment |  |  |
| Major (Score of 3+) | 1680 (45.10%) | 2014 (54.06%) |
| Mild (Score of 1-2) | 1710 (45.91%) | 1213 (32.57%) |
| None | 335 (8.99%) | 498 (13.37) |
| Overall Health Condition |  |  |
| Poor | 717 (19.25%) | 1183 (31.76%) |
| ADL Impairment |  |  |
| Present (score of 1+) | 398 (10.68%) | 398 (10.68%) |
| Absent | 3327 (89.32%) | 3327 (89.32%) |
| IADL Impairment |  |  |
| Present (score of 1+) | 552 (14.82%) | 552 (14.82%) |
| Absent | 3173 (85.18%) | 3173 (85.18%) |
| Has a regular doctor |  |  |
| Yes | 3564 (95.68%) | 3185 (85.50%) |
| No | 161 (4.32%) | 540 (14.50%) |
| **Psychological Variables** |  |  |
| Rate Your Memory |  |  |
| Poor | 725 (19.46%) | 1411 (37.88%) |
| Good | 3000 (80.54%) | 2314 (62.12%) |
| Outlook on Life |  |  |
| Mild (Score 1-14) | 1069 (28.70%) | 1149 (30.85%) |
| Positive (Score 15-21) | 2656 (71.30%) | 2576 (69.16%) |

**Table 2.** Results of bivariate and multivariate mixed-effects binary logistic regression analysis of composite outcome variable.

| **Independent Variable** | **Bivariate Model** | | | **Adjusted Model** | | | | **Weighted Adjusted Model** | | | |
| --- | --- | --- | --- | --- | --- | --- | --- | --- | --- | --- | --- |
| ***OR*** | ***95% CI*** | ***p-value*** | | ***OR*** | ***95% CI*** | ***p-value*** | | ***OR*** | ***95% CI*** | ***p-value*** | |
| Round | 1.15 | 1.13-1.18 | <.0001 | | 1.08 | 1.05-1.10 | <.0001 | | 1.06 | 1.04-1.08 | <.0008 | |
| Hearing Impairment Present (Ref=Absent) | 1.58 | 1.39-1.79 | <.0001 | | 1.56 | 1.05-1.10 | <.0001 | | 1.47 | 1.31-1.66 | <.0001 | |
| Near Vision Loss Present (Ref=Absent) | 1.43 | 1.17-1.73 | <.0001 | | 0.90 | 1.36-1.79 | 0.347 | | 0.89 | 0.76-1.08 | 0.223 | |
| Distance Vision Loss Present (Ref= Absent) | 1.40 | 1.24-1.80 | 0.0005 | | 1.0 | 0.72-1.13 | 0.99 | | 0.95 | 0.80-1.14 | 0.578 | |
| Gender Male (Ref=Female) | 1.27 | 1.03-1.57 | 0.026 | | 1.64 | 1.37-1.96 | <.0001 | | 2.08 | 1.65-2.61 | <.0001 | |
| Age 75 + (Ref=65-74) | 6.54 | 5.26-8.13 | <.0001 | | 2.84 | 2.35-3.44 | <.0001 | | 4.66 | 3.71-5.85 | <.0001 | |
| Education (Ref= Some College or above)  Below High School  High School or Trade  School | 5.27  2.14 | 3.99-6.96  1.69-2.70 | <.0001  <.0001 | | 1.59  1.36 | 1.23-2.06  1.11-1.67 | .0004  .0030 | | 1.79  1.50 | 1.30-2.45  1.18-1.92 | 0.0003  0.0011 | |
| Race (Ref= White, non-Hispanic)  Black, Non Hispanic  Other Race  Hispanic | 1.61  1.65  4.06 | 1.24-2.08  0.85-3.22  2.58-6.41 | 0.0003  0.139  <.0001 | | 1.01  1.21  1.46 | . 0.80-1.28  0.69-2.14  0.98-2.17 | 0.942  0.503  0.053 | | 1.18  1.28  1.73 | 0.88-1.58  0.65-2.50  1.07-2.90 | 0.272  0.479  0.025 | |
| Marital Status (Ref= Separated, divorced, widowed, never married)  Married or w/ partner | 0.68 | 0.57-0.81 | 0.0161 | | 1.31 | 1.10-1.55 | 0.002 | | 1.08 | 0.91-1.29 | 0.364 | |
| Medical Management (Ref=Otherwise)  Always did it by self | 0.063 | 0.054-0.073 | <.0001 | | 0.13 | 0.11-0.16 | <.0001 | | 0.15 | 0.13-0.17 | <.0001 | |
| Health Condition Impairment (Ref=None)  Major   Mild | 33.18  9.52 | 23.73-46.39  6.84-13.26 | <.0001  <.0001 | | 11.06  6.09 | 7.81-15.65  4.31-8.60 | <.0001  <.0001 | | 16.10  8.35 | 11.73-22.10  6.12-11.39 | <.0001  <.0001 | |
| Overall Health Condition (Ref=Good)  Poor | 2.14 | 1.90-2.41 | <.0001 | | 1.71 | 1.55-1.95 | <.0001 | | 1.93 | 1.73-2.17 | <.0001 | |
| Activities of Daily Living (ADL) Impairment (Ref=None)  Present | 12.63 | 1.90-2.41 | <.0001 | | 2.05 | 1.52-2.79 | <.0001 | | 2.46 | 1.70-3.57 | <.0001 | |
| Instrumental Activities of Daily Living (IADL) Impairment (Ref=None)  Present | 16.22 | 9.29-17.15 | <.0001 | | 3.41 | 2.61-4.45 | <.0001 | | 4.60 | 3.31-6.40 | <.0001 | |
| Has a Regular Doctor (Ref=No) | 4.28 | 3.42-5.35 | <.0001 | | 2.09 | 1.69-2.58 | <.0001 | | 2.05 | 1.66-2.53 | <.0001 | |
| Rate your Mem  (Ref=Good)  Poor | 2.40 | 2.14-2.69 | <.0001 | | 1.59 | 1.40-1.80 | <.0001 | | 1.53 | 1.37-1.70 | <.0001 | |
| Outlook on Life (Ref= Positive)  Mild | 1.39 | 1.23-1.54 | <.0001 | | 1.16 | 1.03-1.30 | 0.012 | | 1.14 | 1.04-1.26 | 0.006 | |

**Table 3.** Results of mixed-effects binary logistic regression analyses for question “ *In* *the last year, did anyone sit in with (you/SP) and (your/(their))(regular) doctor during (your/his/her) visits?*”

| **Independent Variable** | **Bivariate Model** | | | **Adjusted Model** | | | | **Weighted Adjusted Model** | | | |
| --- | --- | --- | --- | --- | --- | --- | --- | --- | --- | --- | --- |
| ***OR*** | ***95% CI*** | ***p-value*** | | ***OR*** | ***95% CI*** | ***p-value*** | | ***OR*** | ***95% CI*** | ***p-value*** | |
| Round | 1.08 | 1.06-1.10 | <.0001 | | 1.05 | 1.03-1.07 | <.0001 | | 1.02 | 1.01-1.04 | 0.01 | |
| Hearing Impairment Present (Ref=Absent) | 1.22 | 1.09-1.36 | <.0001 | | 1.31 | 1.16-1.48 | <.0001 | | 1.26 | 1.14-1.40 | <.0001 | |
| Near Vision Loss Present (Ref=Absent) | 1.17 | 0.97-1.41 | 0.0007 | | 0.93 | 0.75-1.14 | 0.48 | | 0.96 | 0.80-1.15 | 0.631 | |
| Distance Vision Loss Present (Ref= Absent) | 1.35 | 1.14-1.61 | 0.09 | | 1.18 | 0.97-1.43 | 0.091 | | 1.17 | 0.99-1.38 | 0.067 | |
| Gender Male (Ref=Female) | 1.22 | 1.02-1.46 | 0.03 | | 1.21 | 1.02-1.43 | 0.03 | | 1.36 | 1.11-1.66 | 0.003 | |
| Age 75 + (Ref=65-74) | 4.83 | 3.79-6.16 | <.0001 | | 3.02 | 2.55-3.57 | <.0001 | | 4.14 | 3.40-5.03 | <.0001 | |
| Education (Ref= Some College or above)  Below High School  High School or Trade  School | 3.10  1.62 | 2.46-3.93  1.33-1.97 | <.0001  <.0001 | | 1.61  1.24 | 1.28-2.04  1.04-1.48 | <.0001  0.020 | | 1.75  1.35 | 1.32-2.31  1.09-1.67 | <.0001  0.006 | |
| Race (Ref= White, non-Hispanic)  Black, Non Hispanic  Other Race  Hispanic | 1.14  1.21  2.43 | 0.91-1.41  0.98-2.15  1.64-3.62 | 0.26  0.52  <.0001 | | 0.93  1.03  1.26 | 0.75-1.15  0.61-1.73  0.87-1.83 | 0.48  0.906  0.229 | | 0.98  1.12  1.33 | 0.76-1.27  0.61-2.03  0.86-2.04 | 0.865  0.723  0.201 | |
| Marital Status (Ref= Separated, divorced, widowed, never married)  Married or w/ partner | 1.56 | 1.35-1.79 | <.0001 | | 2.77 | 2.40-3.21 | <.0001 | | 2.77 | 2.40-3.18 | <.0001 | |
| Medical Management (Ref=Otherwise)  Always did it by self | 0.09 | 0.08-0.11 | <.0001 | | 0.17 | 0.14-0.20 | <.0001 | | 0.20 | 0.18-0.23 | <.0001 | |
| Health Condition Impairment (Ref=None)  Major   Mild | 29.05  9.34 | 22.48-37.53  7.27-11.99 | <.0001  <.0001 | | 13.45  6.44 | 10.29-17.57  4.96-8.36 | <.0001  <.0001 | | 14.61  5.99 | 11.68-18.28  4.84-7.40 | <.0001  <.0001 | |
| Overall Health Condition (Ref=Good)  Poor | 1.57 | 1.41-1.75 | <.0001 | | 1.50 | 1.33-1.69 | <.0001 | | 1.56 | 1.41-1.72 | <.0001 | |
| Activities of Daily Living (ADL) Impairment (Ref=None)  Present | 7.49 | 5.71-9.83 | <.0001 | | 1.95 | 1.47-2.58 | <.0001 | | 2.15 | 1.53-3.01 | <.0001 | |
| Instrumental Activities of Daily Living (IADL) Impairment (Ref=None)  Present | 8.77 | 6.94-10.09 | <.0001 | | 2.70 | 2.10-3.48 | <.0001 | | 3.46 | 2.56-4.66 | <.0001 | |
| Has a Regular Doctor (Ref=No) | 4.21 | 3.52-5.05 | <.0001 | | 2.07 | 1.69-2.55 | <.0001 | | 1.68 | 1.43-1.98 | <.0001 | |
| Rate your Memory  (Ref=Good)  Poor | 1.38 | 1.25-1.53 | <.0001 | | 1.06 | 0.95-1.19 | 0.301 | | 1.02 | 0.93-1.12 | 0.70 | |
| Outlook on Life (Ref= Positive)  Mild | 1.35 | 1.23-1.49 | <.0001 | | 1.14 | 1.04-1.26 | 0.008 | | 1.07 | 0.99-1.16 | 0.09 | |

**Table 4.** Results of mixed-effects binary logistic regression analyses for question “*Did you or anyone remind SP of questions you wanted to ask the doctor during the doctor's visit last year?*

| **Independent Variable** | **Bivariate Model** | | | **Adjusted Model** | | | | **Weighted Adjusted Model** | | | |
| --- | --- | --- | --- | --- | --- | --- | --- | --- | --- | --- | --- |
| ***OR*** | ***95% CI*** | ***p-value*** | | ***OR*** | ***95% CI*** | ***p-value*** | | ***OR*** | ***95% CI*** | ***p-value*** | |
| Round | 1.12 | 1.09-1.14 | <.0001 | | 1.06 | 1.03-1.08 | <.0001 | | 1.05 | 1.03-1.07 | <.0001 | |
| Hearing Impairment Present (Ref=Absent) | 1.46 | 1.28-1.64 | <.0001 | | 1.39 | 1.22-1.59 | <.0001 | | 1.41 | 1.26-1.59 | <.0001 | |
| Near Vision Loss Present (Ref=Absent) | 1.33 | 1.09-1.62 | <.0001 | | 0.86 | 0.96-1.08 | 0.20 | | 0.82 | 0.67-0.99 | 0.043 | |
| Distance Vision Loss Present (Ref= Absent) | 1.53 | 1.28-1.96 | 0.006 | | 1.12 | 0.92-1.37 | 0.275 | | 1.17 | 0.98-1.40 | 0.083 | |
| Gender Male (Ref=Female) | 1.60 | 1.31-1.96 | <.0001 | | 1.80 | 1.49-2.19 | <.0001 | | 2.32 | 1.85-2.92 | <.0001 | |
| Age 75 + (Ref=65-74) | 6.10 | 4.52-8.24 | <.0001 | | 2.59 | 2.15-3.12 | <.0001 | | 3.97 | 3.17-4.97 | <.0001 | |
| Education (Ref= Some College or above)  Below High School  High School or Trade  School | 3.11  1.63 | 2.37-4.07  1.30-2.04 | <.0001  <.0001 | | 1.22  1.17 | 0.95-1.59  0.96-1.43 | <.0001  0.073 | | 1.31  1.26 | 0.96-1.80  0.99-1.61 | 0.094  0.061 | |
| Race (Ref= White, non-Hispanic)  Black, Non Hispanic  Other Race  Hispanic | 1.23  1.00  2.64 | 0.96-1.59  0.52-1.93  1.69-4.10 | 0.10  0.99  <.0001 | | 0.93  0.73  1.18 | 0.74-1.18  0.41-1.30  0.79-1.79 | 0.564  0.289  0.427 | | 1.05  0.76  1.36 | 0.79-1.41  0.39-1.51  0.84-2.19 | 0.725  0.434  0.215 | |
| Marital Status (Ref= Separated, divorced, widowed, never married)  Married or w/ partner | 1.06 | 0.90-1.25 | 0.47 | | 1.75 | 1.48-2.06 | <.0001 | | 1.49 | 1.26-1.76 | <.0001 | |
| Medical Management (Ref=Otherwise)  Always did it by self | 0.10 | 0.08-0.11 | <.0001 | | 0.18 | 0.16-0.22 | <.0001 | | 0.21 | 0.19-0.25 | <.0001 | |
| Health Condition Impairment (Ref=None)  Major   Mild | 23.55  7.31 | 17.05-32.52  5.31-10.07 | <.0001  <.0001 | | 9.57  4.86 | 6.85-13.37  3.49-6.77 | <.0001  <.0001 | | 13.89  6.58 | 10.25-18.83  4.89-8.67 | <.0001  <.0001 | |
| Overall Health Condition (Ref=Good)  Poor | 1.93 | 1.71-2.17 | <.0001 | | 1.62 | 1.42-1.84 | <.0001 | | 1.74 | 1.56-1.94 | <.0001 | |
| Activities of Daily Living (ADL) Impairment (Ref=None)  Present | 8.23 | 6.12-11.07 | <.0001 | | 1.81 | 1.34-2.44 | <.0001 | | 2.13 | 1.47-3.09 | <.0001 | |
| Instrumental Activities of Daily Living (IADL) Impairment (Ref=None)  Present | 10.98 | 8.49-14.21 | <.0001 | | 3.10 | 2.37-5.05 | <.0001 | | 4.17 | 3.00-5.81 | <.0001 | |
| Has a Regular Doctor (Ref=No) | 3.92 | 3.14-4.89 | <.0001 | | 2.38 | 1.85-3.06 | <.0001 | | 1.87 | 1.52-2.29 | <.0001 | |
| Rate your Memory  (Ref=Good)  Poor | 1.96 | 1.75-2.20 | <.0001 | | 1.38 | 1.22-1.56 | <.0001 | | 1.35 | 1.21-1.50 | <.0001 | |
| Outlook on Life (Ref= Positive)  Mild | 1.41 | 1.27-1.57 | <.0001 | | 1.22 | 1.10-1.37 | 0.0004 | | 1.22 | 1.11-1.34 | <.0001 | |

**Table 5.** Results of mixed-effects binary logistic regression analyses for question “*During doctor visits in the last year, did you or anyone ask/tell things for you/SP?*”

| **Independent Variable** | **Bivariate Model** | | | **Adjusted Model** | | | | **Weighted Adjusted Model** | | | |
| --- | --- | --- | --- | --- | --- | --- | --- | --- | --- | --- | --- |
| ***OR*** | ***95% CI*** | ***p-value*** | | ***OR*** | ***95% CI*** | ***p-value*** | | ***OR*** | ***95% CI*** | ***p-value*** | |
| Round | 1.14 | 1.12-1.17 | <.0001 | | 1.07 | 1.05-1.10 | <.0001 | | 1.05 | 1.05-1.07 | <.0001 | |
| Hearing Impairment Present (Ref=Absent) | 1.43 | 1.26-1.62 | <.0001 | | 1.41 | 1.23-1.61 | <.0001 | | 1.34 | 1.19-1.50 | <.0001 | |
| Near Vision Loss Present (Ref=Absent) | 1.47 | 1.20-1.79 | 0.0002 | | 0.57 | 0.45-1.17 | 0.67 | | 0.85 | 0.70-1.04 | 0.113 | |
| Distance Vision Loss Present (Ref= Absent) | 1.51 | 1.26-1.82 | <.0001 | | 1.02 | 0.84-1.25 | 0.844 | | 0.93 | 0.78-1.11 | 0.420 | |
| Gender Male (Ref=Female) | 1.16 | 0.95-1.42 | 0.15 | | 1.48 | 1.23-1.78 | <.0001 | | 1.81 | 1.46-2.25 | <.0001 | |
| Age 75 + (Ref=65-74) | 9.29 | 4.65-8.50 | <.0001 | | 2.52 | 2.11-3.02 | <.0001 | | 3.97 | 3.21-4.92 | <.0001 | |
| Education (Ref= Some College or above)  Below High School  High School or Trade  School | 4.61  1.92 | 3.51-6.00  1.54-2.39 | <.0001  <.0001 | | 1.50  1.25 | 1.18-1.91  1.03-1.51 | 0.0011  0.025 | | 1.68  1.37 | 1.24-2.25  1.09-1.72 | 0.0007  0.008 | |
| Race (Ref= White, non-Hispanic)  Black, Non Hispanic  Other Race  Hispanic | 1.65  1.67  3.49 | 1.29-2.10  0.89-3.13  2.27-5.38 | <.0001  0.11  <.0001 | | 1.05  1.25  1.35 | 0.84-1.31  0.73-2.13  0.92-1.97 | 0.672  0.413  0.127 | | 1.20  1.26  1.42 | 0.91-1.59  0.67-2.37  0.90-2.23 | 0.193  0.472  0.132 | |
| Marital Status (Ref= Separated, divorced, widowed, never married)  Married or w/ partner | 0.71 | 0.60-0.84 | <.0001 | | 1.33 | 1.13-1.56 | 0.001 | | 1.17 | 0.99-1.39 | 0.063 | |
| Medical Management (Ref=Otherwise)  Always did it by self | 0.07 | 0.06-0.08 | <.0001 | | 0.15 | 0.13-0.17 | <.0001 | | 0.17 | 0.15-0.20 | <.0001 | |
| Health Condition Impairment (Ref=None)  Major   Mild | 32.15  9.29 | 23.09-44.75  6.70-12.88 | <.0001  <.0001 | | 11.00  5.99 | 7.83-15.44  4.26-8.37 | <.0001  <.0001 | | 16.00  7.93 | 11.74-21.80  5.85-10.74 | <.0001  <.0001 | |
| Overall Health Condition (Ref=Good)  Poor | 2.17 | 1.93-2.44 | <.0001 | | 1.73 | 1.52-1.97 | <.0001 | | 1.98 | 1.78-2.21 | <.0001 | |
| Activities of Daily Living (ADL) Impairment (Ref=None)  Present | 8.23 | 6.12-11.07 | <.0001 | | 2.05 | 1.55-2.72 | <.0001 | | 2.43 | 1.72-3.45 | <.0001 | |
| Instrumental Activities of Daily Living (IADL) Impairment (Ref=None)  Present | 11.58 | 8.68-15.44 | <.0001 | | 3.11 | 2.41-4.00 | <.0001 | | 4.25 | 3.12-5.80 | <.0001 | |
| Has a Regular Doctor (Ref=No) | 4.14 | 3.32-5.16 | <.0001 | | 2.43 | 1.88-3.13 | <.0001 | | 2.02 | 1.65-2.49 | <.0001 | |
| Rate your Memory  (Ref=Good)  Poor | 2.29 | 2.04-2.56 | <.0001 | | 1.52 | 1.34-1.71 | <.0001 | | 1.47 | 1.33-1.64 | <.0001 | |
| Outlook on Life (Ref= Positive)  Mild | 1.36 | 1.22-1.52 | <.0001 | | 1.14 | 1.02-1.27 | 0.021 | | 1.13 | 1.03-1.24 | 0.011 | |

**Table 6.** Results of mixed-effects binary logistic regression analyses for question “*During those visits in the last year, did you or anyone else help SP understand what the doctor was saying?*”

| **Independent Variable** | **Bivariate Model** | | | **Adjusted Model** | | | | **Weighted Adjusted Model** | | | |
| --- | --- | --- | --- | --- | --- | --- | --- | --- | --- | --- | --- |
| ***OR*** | ***95% CI*** | ***p-value*** | | ***OR*** | ***95% CI*** | ***p-value*** | | ***OR*** | ***95% CI*** | ***p-value*** | |
| Round | 1.16 | 1.14-1.19 | <.0001 | | 1.10 | 1.07-1.12 | <.0001 | | 1.09 | 1.07-1.11 | <.0001 | |
| Hearing Impairment Present (Ref=Absent) | 1.68 | 1.47-1.91 | <.0001 | | 1.69 | 1.48-1.94 | <.0001 | | 1.57 | 1.39-1.78 | <.0001 | |
| Near Vision Loss Present (Ref=Absent) | 1.36 | 1.11-1.67 | 0.0029 | | 0.83 | 0.66-1.04 | 0.104 | | 0.80 | 0.76-0.98 | 0.028 | |
| Distance Vision Loss Present (Ref= Absent) | 1.57 | 1.30-1.90 | <.0001 | | 1.07 | 0.87-1.31 | 0.535 | | 0.96 | 0.80-1.15 | 0.638 | |
| Gender Male (Ref=Female) | 1.07 | 0.86-1.33 | 0.54 | | 1.50 | 1.23-1.83 | <.0001 | | 1.80 | 1.42-2.27 | <.0001 | |
| Age 75 + (Ref=65-74) | 3.17 | 2.69-3.74 | <.0001 | | 3.36 | 2.77-4.10 | <.0001 | | 5.84 | 4.63-7.37 | <.0001 | |
| Education (Ref= Some College or above)  Below High School  High School or Trade  School | 7.91  2.67 | 5.94-10.50  2.11-3.38 | <.0001  <.0001 | | 2.33  1.65 | 1.80-3.02  1.34-2.02 | <.0001  <.0001 | | 2.82  1.91 | 2.05-3.88  1.49-2.45 | <.0001  <.0001 | |
| Race (Ref= White, non-Hispanic)  Black, Non Hispanic  Other Race  Hispanic | 1.94  1.71  5.57 | 1.49-2.52  0.86-3.34  3.51-8.83 | <.0001  0.12  <.0001 | | 1.14  1.39  1.87 | 0.90-1.45  0.79-2.47  1.26-2.80 | 0.265  0.256  0.002 | | 1.42  1.46  2.21 | 1.06-1.91  0.74-2.89  1.36-3.59 | 0.020  0.278  0.0013 | |
| Marital Status (Ref= Separated, divorced, widowed, never married)  Married or w/ partner | 0.56 | 0.47-0.67 | <.0001 | | 1.15 | 0.97-1.37 | 0.118 | | 1.04 | 0.87-1.24 | 0.708 | |
| Medical Management (Ref=Otherwise)  Always did it by self | 0.07 | 0.06-0.09 | <.0001 | | 0.17 | 0.14-0.19 | <.0001 | | 0.18 | 0.15-0.20 | <.0001 | |
| Health Condition Impairment (Ref=None)  Major   Mild | 32.74  9.14 | 22.63-44.52  6.55-12.76 | <.0001  <.0001 | | 10.58  6.02 | 7.45-15.03  4.24-8.53 | <.0001  <.0001 | | 15.40  7.81 | 11.19-21.18  5.71-10.68 | <.0001  <.0001 | |
| Overall Health Condition (Ref=Good)  Poor | 1.91 | 1.69-2.16 | <.0001 | | 1.46 | 1.28-1.67 | <.0001 | | 1.55 | 1.38-1.74 | <.0001 | |
| Activities of Daily Living (ADL) Impairment (Ref=None)  Present | 14.10 | 10.32-19.26 | <.0001 | | 2.13 | 1.58-2.88 | <.0001 | | 2.49 | 1.71-3.63 | <.0001 | |
| Instrumental Activities of Daily Living (IADL) Impairment (Ref=None)  Present | 17.37 | 13.28-22.72 | <.0001 | | 3.36 | 2.57-4.40 | <.0001 | | 4.70 | 3.36-6.56 | <.0001 | |
| Has a Regular Doctor (Ref=No) | 3.90 | 3.12-4.88 | <.0001 | | 2.41 | 1.86-3.13 | <.0001 | | 1.95 | 1.58-2.41 | <.0001 | |
| Rate your Memory  (Ref=Good)  Poor | 2.27 | 2.02-2.55 | <.0001 | | 1.46 | 1.29-1.66 | <.0001 | | 1.42 | 1.27-1.59 | <.0001 | |
| Outlook on Life (Ref= Positive)  Mild | 1.33 | 1.22-1.52 | <.0001 | | 1.11 | 0.99-1.24 | 0.08 | | 1.10 | 1.00-1.21 | 0.056 | |
